# Supplementary material
Source: PubMed Central journal article supplement (PMC4225592)
Supplement: mmc1.pdf [file mmc1.pdf]

The American Journal of Human Genetics, Volume 95

Supplemental Data

**Dosage Changes of a Segment at 17p13.1 Leads  
to Intellectual Disability and Microcephaly  
due to Complex Genetic Interaction of Multiple Genes**

**Claudia M.B. Carvalho, Shivakumar Vasanth, Marwan Shinawi, Chad Russell, Melissa B. Ramocki, Chester W. Brown, Jesper Graakjaer, Anne-Bine Skytte, Angela M. Vianna-Morgante, Ana C.V. Krepischi, Gayle Simpson Patel, La Donna Immken, Kyriekos Aleck, Cynthia Lim, Sau Wai Cheung, Carla Rosenberg, Nicholas Katsanis, and James R. Lupski**

**A**

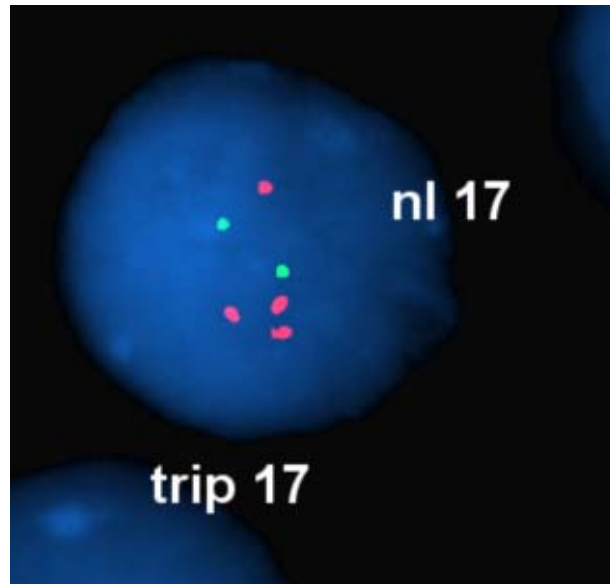

**B**

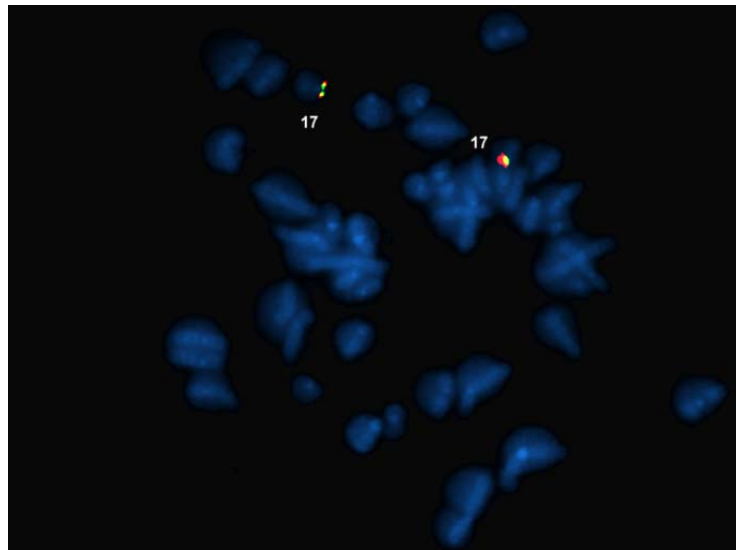

**Figure S1 - Dual-color FISH supports presence of triplication in individual BAB3045**

BAC clone RP11-599B13 (red) was used to target the triplicated segment and BAC RP11-601N13 (green) was used as control probe. **(A)** Interphase representative FISH **(B)** Metaphase representative FISH. Trip: triplication; nl: normal

**A**

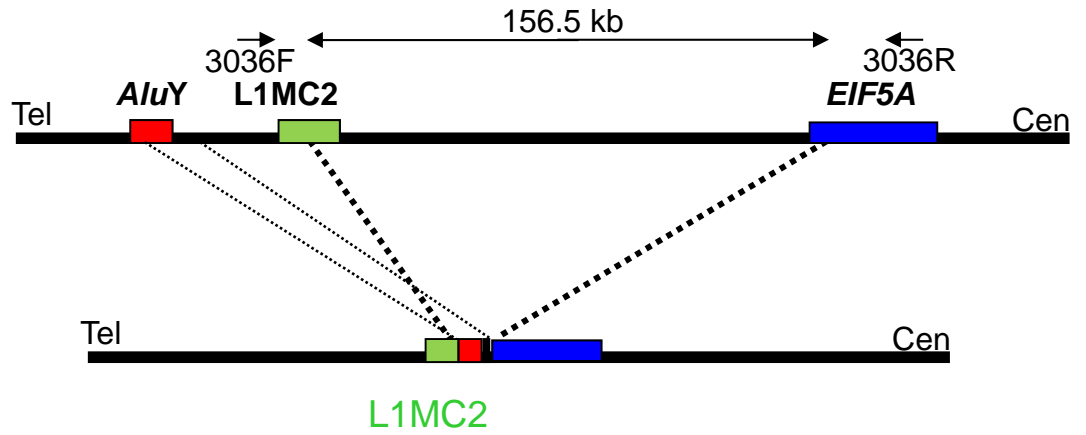

interg (+) TCTATTAAAATGGCTAAAATCCAAACATTGACAACACCAAATGTTGGCAAGGATGTGGAACAAGAG

BAB3036 TCTATTAAAATGGCTAAAATCCAACaCCCGCCACCACGCCCGGcTAATTTTTTGTATTTTTTGGTAGA

interg (+) CTCCTGAGTAGCTGGGACTGGAGGCgCCCGCCACCACGCCCGGgTAATTTTTTGTATTTTTTGGTAGA

interg (+) GACAGGGTTTCACCATGTTAGCCAGGATGGTCTCGATCGTGTTTAAAATTTTTATACCAACTGGCAT

BAB3036 GACAGGGTTTCACCATGTTAGCCAGGATGGTCTCGATCGTGTTTAAACTAGCCTAGTATGATTTTCT

EIF5A (+) GTTGTAACTGGTTTGGGAGTTCACGGTTTCGAAGTCCTTAACTCTACTAGCCTAGTATGATTTTCT

**B**

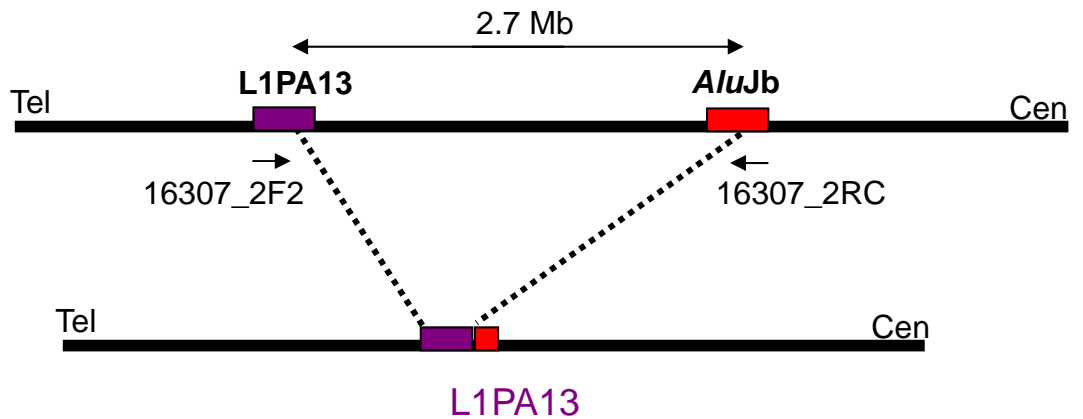

intron\_ *NLRP1* (+) TAGGAATAATCAATATTGTTAAAATCGCCATACTACTCCAAGCAATTTACAGATTCAA

DECIPHER2009 TAGGAATAATCAATATTGTTAAAATCGCCATACTcctGCTGAGGCAGGAGTATCACTT

3'UTR\_ *SLC25A35* (+) GCCGGGCGTGGTGGCGGGAGCAGGAGCCACTCAAGAGGCTGAGGCAGGAGTATCACTT

*AluJb*

**C**

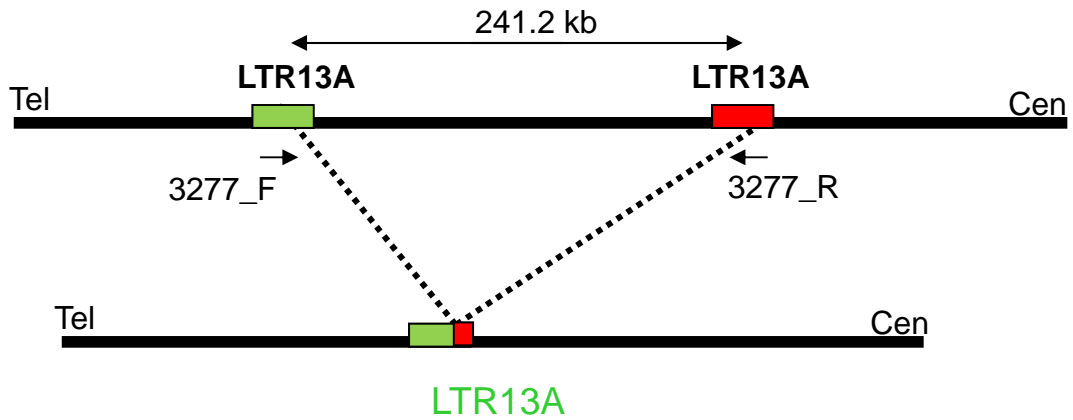

interg (+) CCTATACCTGCCGGTTATTCCTAGGTTATATTAGTAATGCAACAAgCAGTAATATTAAAAGCTAATG

BAB3277 CCTATACCTGCCGGTTATTCCTAGGTTATATTAGTAATGCAACAAaCAGTAATATTAAAAGCTAATG

interg (+) CCTATACCcGCCGGTTATTCCTAGGTTATATTAGTAATGCAACAAaCAGTAATATTAAAAGCTAATG

**LTR13A**

**D**

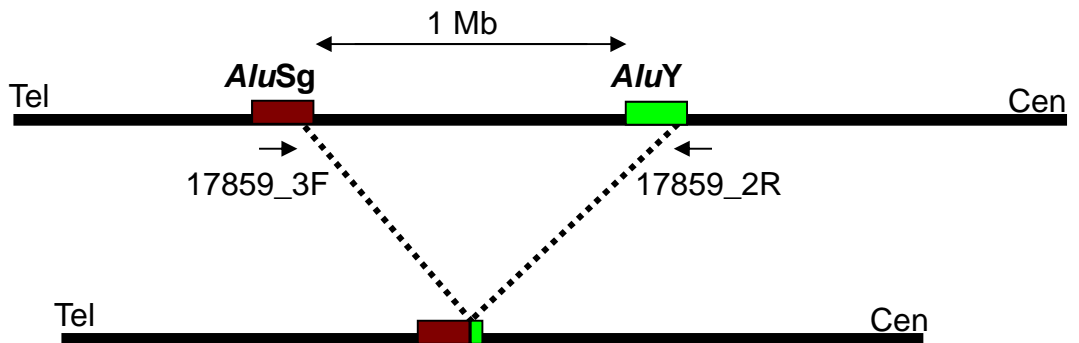

interg (+) CCAAAGTGCTGGGATTACAGGTATGAGCCACCACGCCTGGTCAACCTTTTCTATTTCTCT

DECIPHER2173 CCAAAGTGCTGGGATTACAGGTATGAGCCACGTACCCGGCTTTTTTTTTTTTTTTTTTTT

intron\_DNAH2 (+) CCAAAGTGCTGGGATTACAGGTGTGAGCCACGTACCCGGCTTTTTTTTTTTTTTTTTTTT

**AluY**

**AluSx**

**Figure S2 - Breakpoint junction sequencing data for subjects with deletions spanning 17p13.1. (A) BAB3036 (B) DECIPHER2009 (C) BAB3277 (D) DECIPHER2173**

Breakpoint junction sequences are color-matched and aligned to respective proximal and distal genomic reference. Strand of alignment (+ or -) is indicated in parenthesis. Genomic sequences that are part of repetitive elements are underlined. Microhomology at the breakpoint is indicated by underlined black bold letters; mismatches (point mutations or insertions) between the breakpoint junction sequence and the reference genome are represented as black small letters; asterisks indicate location of point mutation. Deletion junction in subject BAB3036 presented with an insertion of part of an *Alu* element. No microhomology is immediately apparent at that junction but polymerase slippage between the short repeats present at both proximal and distal junctions (as indicated by blue arrows) would provide microhomology.

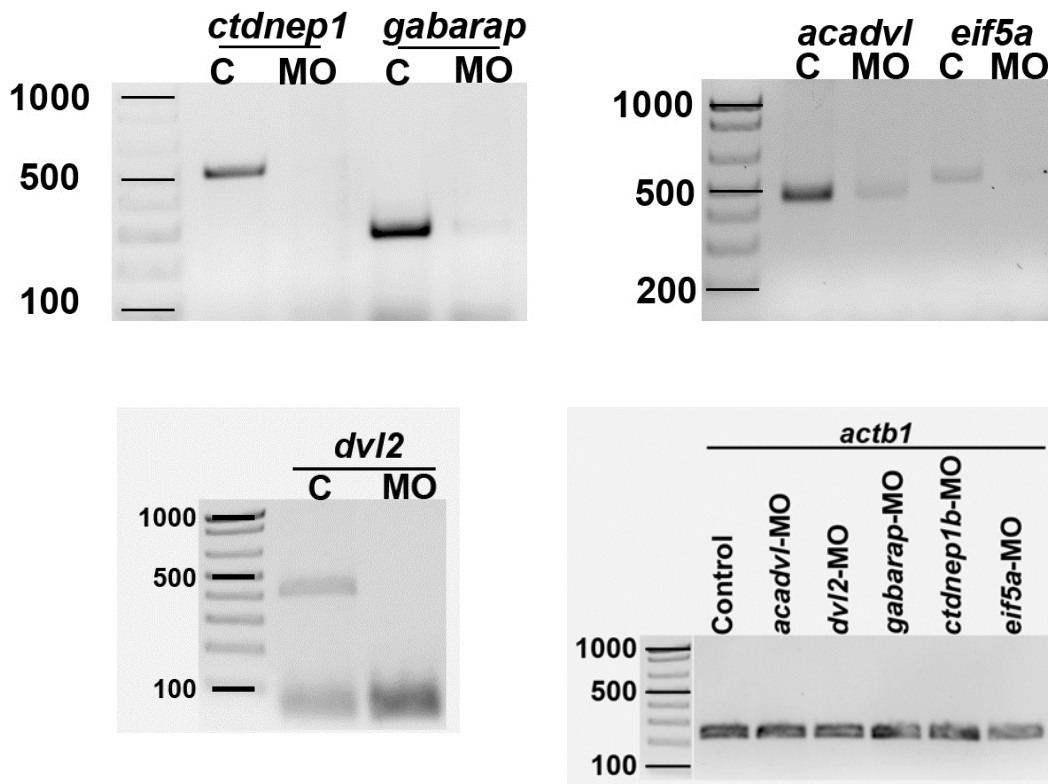

**Figure S3 - RT-PCR to test the knockdown of the gene expression in zebrafish embryos on injection with morpholino**

*actb1*: zebrafish beta actin 1 gene. Uninjected zebrafish embryos or injected with *ctdnep1b*, *gabarap*, *acadvl*, *eif5a*, and *dvl2* individually, were utilized for RNA extraction at 24dpf. The resultant cDNA from these RNA were tested for the knockdown of the gene expression of these respective genes in both control and morpholino injected RNA by RT-PCR. All the morpholinos result in either complete loss of the mRNA (*dvl2*, *ctdnep1*, and *eif5a*) or a partial loss (*acadvl* and *gabarap*). Bottom right panel shows the control PCR detecting the expression for  $\beta$ -actin.

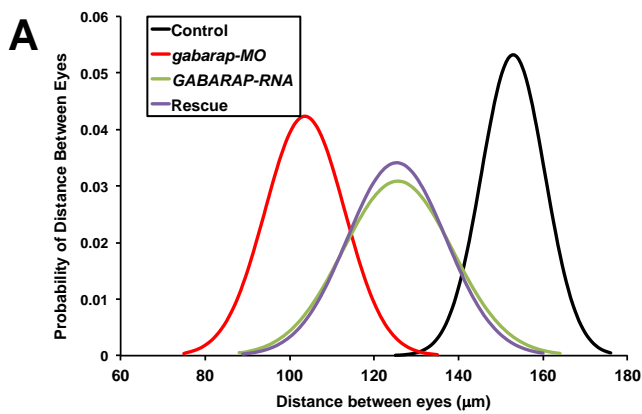

|                        | Z-score |
|------------------------|---------|
| <i>gabarap</i> -MO     | -6.573  |
| <i>GABARAP</i> -RNA    | -3.640  |
| <i>gabarap</i> -Rescue | -3.677  |

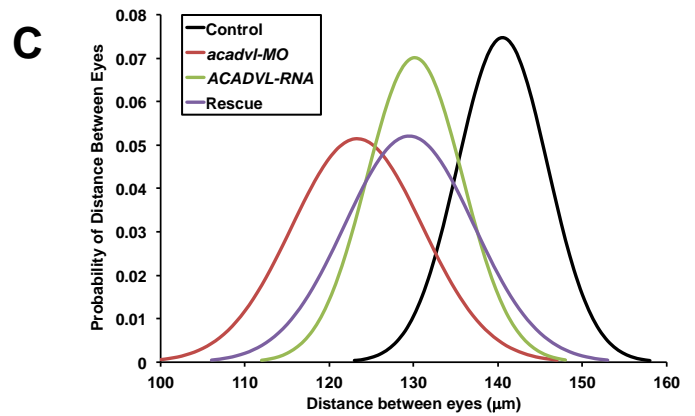

|                       | Z-score |
|-----------------------|---------|
| <i>acadvl</i> -MO     | -3.235  |
| <i>ACADVL</i> -RNA    | -1.953  |
| <i>acadvl</i> -Rescue | -2.075  |

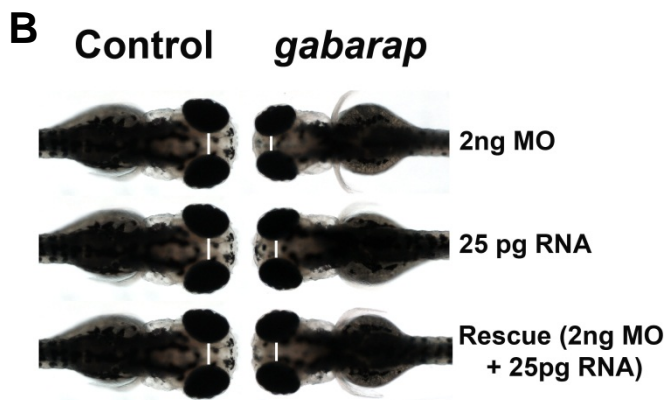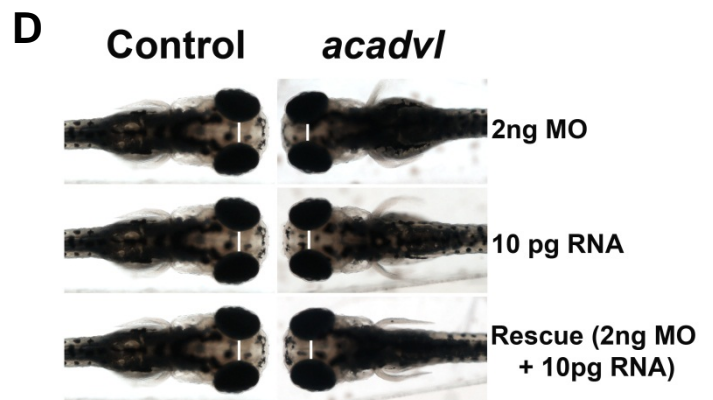

**Figure S4 - Rescue of microcephaly induced by three severe loci.** Microcephaly induced by morpholino against two of the three severe loci, namely, *gabarap* and *acadvl* were rescued by co-injecting their respective capped human mRNAs. Probability distribution curves of the distance between eyes in 4dpf zebrafish embryos are plotted for MO, human mRNA, and co-injection of morpholino and human mRNA for *GABARAP* (A) and *ACADVL* (C). The co-injection of human mRNA with the morpholino rescued the microcephaly in both (A) and (C). (B, D) Representative dorsal images of zebrafish embryos injected with the indicated morpholino and human mRNA scored for microcephaly at 4dpf. The white lines represent the distance calculated between eyes.

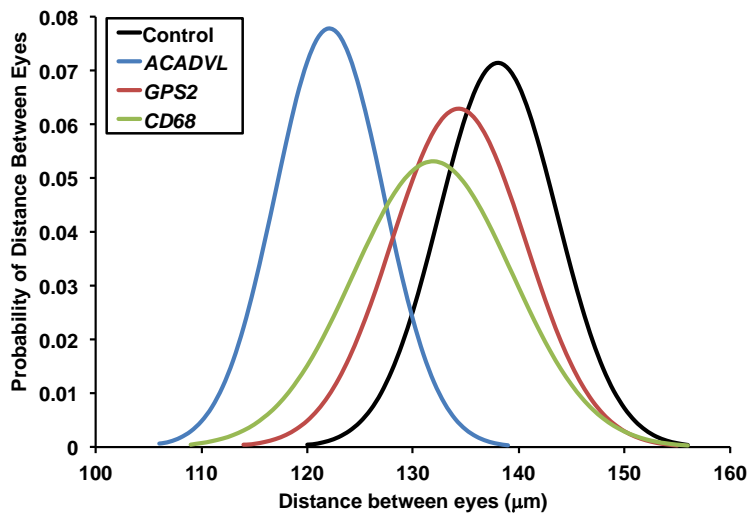

| Human RNA     | Z score |
|---------------|---------|
| <i>GPS2</i>   | -0.665  |
| <i>CD68</i>   | -1.099  |
| <i>ACADVL</i> | -2.849  |

**Figure S5 - Analysis of loci outside smallest region of overlap (SRO) for microcephaly in 4dpf zebrafish embryos**

Probability distribution curves of the distance between eyes in 4dpf zebrafish embryos injected with 100pg of the indicated capped human mRNAs. Both *CD68* and *GPS2* mRNAs do not result in microcephaly, whereas, the injection of *ACADVL* as a positive control induced severe microcephaly.



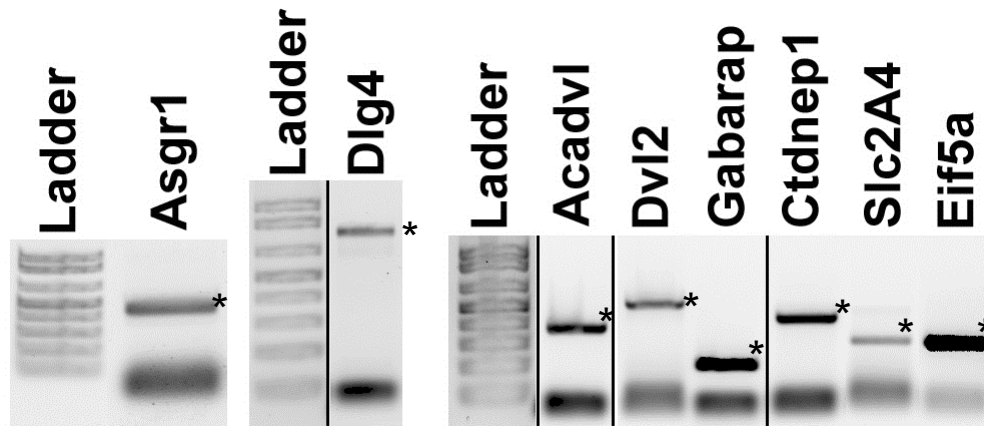

**Figure S6 - RT-PCR analysis to test the expression of genes from SRO segment in Neuro2A cells prior to knockdown by shRNA with primers described in Supplementary Table 4**

RNA extracted from Neuro2A cells was tested for the expression of nine genes in the SRO. Out of these, the expression of eight genes were detected by RT-PCR; *Cldn7* expression could not be detected in Neuro2A cells. \* Indicates the gene-specific bands

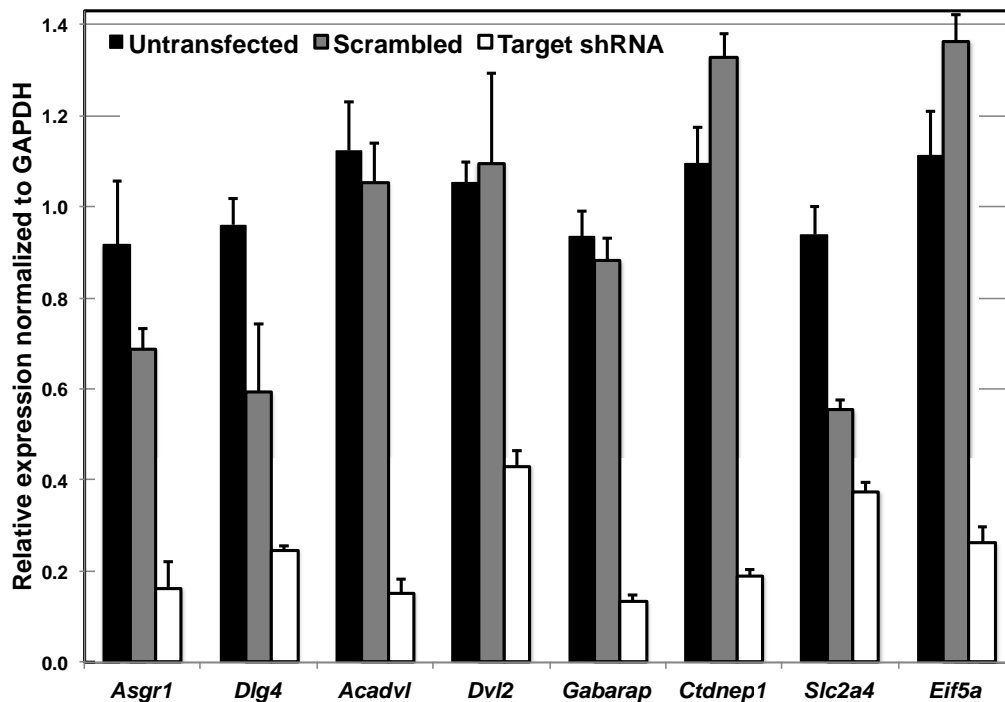

**Figure S7 - Real-time PCR analyses to test the knockdown of indicated genes in Neuro2A cells**

Neuro2A cells were transfected with a pool of four different siRNAs targeting *Asgr1* or non-targeting scrambled siRNA. The remaining seven genes were suppressed with a combination of five shRNAs in pLKO.1 vector for each gene and a non-targeting scrambled shRNA in pLKO.1 vector. RNA extracted from each condition shown was assayed for knockdown of the respective gene expression 48h post transfection. Bars represent the average fold expression and the error bars indicate the standard deviation from three experiments.

**Table S1 - Primers used to amplify the breakpoint junctions by PCR**

| Sample               | Primer    | Primer sequence 5' - 3'  |
|----------------------|-----------|--------------------------|
| <b>DECIPHER 2173</b> | 17859_2R  | GGGCTCCACTGATTCTTCACTCT  |
|                      | 17859_3F  | CTCACAGGCTGGGAATCTTGTTCT |
| <b>DECIPHER 2009</b> | 16307_2RC | ACGGGATGGCAGAAACTTC      |
|                      | 16307_2FC | ACAACCCACAGAATGGGAGA     |
| <b>BAB3036</b>       | 3036_F    | TGCCAGCCTACAGGATACTC     |
|                      | 3036_R    | GCAGAGTTAAAGGAAAGTCAGCA  |
| <b>BAB3277</b>       | 3277_F    | TAGTTTGGCAAGCCTGTCCT     |
|                      | 3277_R    | ACCAGAGGGGAGAAGCTCAG     |

**Table S2 - Sequence of morpholino used for knockdown of the indicated genes in zebrafish**

| Human Gene     | Zebrafish ortholog (Zv9)                  | Sequence of Morpholino    | Target region    |
|----------------|-------------------------------------------|---------------------------|------------------|
| <i>ACADVL</i>  | <i>acadvl</i><br>Chr7:21455329:21491712:1 | ATGAAGCCAAGAGTCTCACCTCTGC | SB_exon3 (donor) |
| <i>DVL2</i>    | <i>dvl2</i><br>Chr7:21417445:21453628     | TGAGATTCACAGTAACGTACTGGAA | SB_exon3 (donor) |
| <i>GABARAP</i> | <i>gabarap</i><br>Chr7:72186770:72194682  | TACGACACAAACCGACTTACAGGAA | SB_exon1 (donor) |
| <i>CTDNEP1</i> | <i>ctdnep1b</i><br>Chr7:72166393:72185168 | TTATGAAGACTCACCGTTCGTATGT | SB_exon1 (donor) |
| <i>CLDN7</i>   | <i>cldn7a</i><br>Chr7:23782703:23794544   | ACAAACATACTGATACTCACTGTCC | SB_exon1 (donor) |
| <i>EIF5A</i>   | <i>eif5A</i><br>Chr24:27277302:27282547   | AACCCTATCCAAACATTACCTTTGC | SB_exon2 (donor) |

**Table S3 - List of RT-PCR primers to test the knockdown of gene expression by morpholino for the indicated zebrafish genes**

| <b>Zebrafish Gene</b> | <b>Forward Primer</b>    | <b>Reverse Primer</b>    |
|-----------------------|--------------------------|--------------------------|
| <i>acadvl</i>         | CTGCAGAGGCTGTTCTGGACAAG  | CAATGTTCTCTCCAGTAGCCAGCT |
| <i>dvl2</i>           | CTTCAACGGAAGAGTTGTCTCCTG | GCTGCTGAACCTGCTCATGGTAT  |
| <i>gabarap</i>        | CTTTGAGAAGAGGCGATCAGAG   | GTGATGTTCTGGTACAACCTGGCC |
| <i>ctdnep1</i>        | CTCACGGACTCTGGTGTTATG    | CCAGCGTACAGTGCTGTCTGTAG  |
| <i>eif5a</i>          | CGCGGTGACTTGACTGAAATA    | GCTGAAAGCACAGTCACCAACA   |

**Table S4 - Primer pairs to test the expression of the indicated genes in Neuro2A cells**

| <b>Mouse Gene</b> | <b>Forward Primer</b> | <b>Reverse Primer</b>  | <b>Product Size (bp)</b> |
|-------------------|-----------------------|------------------------|--------------------------|
| <i>Asgr1</i>      | CATCCCAAATTCCCAACTCC  | CTCCAATTCTGGAAGCCTGTC  | 392                      |
| <i>Dlg4</i>       | GTGACAACCAAGAAATACCGC | ATATGAGGTTGTGATGTCTGGG | 773                      |
| <i>Acadvl</i>     | CTCTGCAAGGCTGTATGGAC  | CCTCAATGCACCAGCTATCA   | 410                      |
| <i>Dvl2</i>       | CGCAACATGGAGAAGTACAAC | CCACATCGGAGCCTAGAA     | 546                      |
| <i>Gabarap</i>    | GTCCCGGTGATAGTGGA     | CATGGTGTTCTGGTACAGC    | 230                      |
| <i>Ctdnep1</i>    | CTGCCCTTATCTCCTTTGTCC | GATGGCATTGTCTGGGTG     | 472                      |
| <i>Slc2a4</i>     | ACAGAAGGTGATTGAACAGAG | TGATGTTAGCCCTGAGTAGG   | 316                      |
| <i>Eif5a</i>      | TTCGCGGAGTTGGAATC     | TGCCAATCAGCTGGAAGTC    | 313                      |

**Table S5 - Sequence of siRNAs targeting *Asgr1* and shRNAs for the remaining genes in the SRO cloned into pLKO.1 vector used for suppression of the indicated genes in Neuro2A cells**

| SYMBOL         | GENE_DESCRIPTION                                                    | OLIGO SEQUENCE         | REFSEQ_ID |
|----------------|---------------------------------------------------------------------|------------------------|-----------|
| <i>Asgr1</i>   | asialoglycoprotein receptor 1                                       | UUAAAGGACCGUAAAGAA     | NM_009714 |
| <i>Asgr1</i>   | asialoglycoprotein receptor 1                                       | GGGCAAUGGCUCUGAAAGG    | NM_009714 |
| <i>Asgr1</i>   | asialoglycoprotein receptor 1                                       | GGAUAAGGCUAAUUAGGAA    | NM_009714 |
| <i>Asgr1</i>   | asialoglycoprotein receptor 1                                       | UGAAGUUAGUGGAGUCGAA    | NM_009714 |
| <i>Dlg4</i>    | discs, large homolog 4 (Drosophila)                                 | ACACGTCCTAAGCGGGAATAT  | NM_007864 |
| <i>Dlg4</i>    | discs, large homolog 4 (Drosophila)                                 | GATCAGTCATAGCAGCTACTT  | NM_007864 |
| <i>Dlg4</i>    | discs, large homolog 4 (Drosophila)                                 | GATCAGTCATAGCAGCTACTT  | NM_007864 |
| <i>Dlg4</i>    | discs, large homolog 4 (Drosophila)                                 | ACACGTCCTAAGCGGGAATAT  | NM_007864 |
| <i>Dlg4</i>    | discs, large homolog 4 (Drosophila)                                 | CCGTTTGAGTTCCTTTTATT   | NM_007864 |
| <i>Dvl2</i>    | dishevelled 2, dsh homolog (Drosophila)                             | CGAGCTTTCTTCGTACACCTA  | NM_007888 |
| <i>Dvl2</i>    | dishevelled 2, dsh homolog (Drosophila)                             | GCTGCCTTTGTTACTCTATTT  | NM_007888 |
| <i>Dvl2</i>    | dishevelled 2, dsh homolog (Drosophila)                             | CTGTGAGAGTTACCTAGTTAA  | NM_007888 |
| <i>Dvl2</i>    | dishevelled 2, dsh homolog (Drosophila)                             | TAGGCGAGACGAAGGTGATTT  | NM_007888 |
| <i>Dvl2</i>    | dishevelled 2, dsh homolog (Drosophila)                             | ACCCATCTTGAGGCCACATTG  | NM_007888 |
| <i>Slc2a4</i>  | solute carrier family 2 (facilitated glucose transporter), member 4 | CCAGTATGTTGCGGATCGTAT  | NM_009204 |
| <i>Slc2a4</i>  | solute carrier family 2 (facilitated glucose transporter), member 4 | GCTCCCTTCAGTTTGGCTATA  | NM_009204 |
| <i>Slc2a4</i>  | solute carrier family 2 (facilitated glucose transporter), member 4 | TGGCATCATTTCTCAATGGTT  | NM_009204 |
| <i>Slc2a4</i>  | solute carrier family 2 (facilitated glucose transporter), member 4 | CTTACGTCTTCTTCTATTTG   | NM_009204 |
| <i>Slc2a4</i>  | solute carrier family 2 (facilitated glucose transporter), member 4 | GAAAGCTTCTGACCAACTAAG  | NM_009204 |
| <i>Acadvl</i>  | acyl-Coenzyme A dehydrogenase, very long chain                      | GCGGTTGATCATGCTACTAAT  | NM_017366 |
| <i>Acadvl</i>  | acyl-Coenzyme A dehydrogenase, very long chain                      | CGGATGGCTATTCTGCAGTAT  | NM_017366 |
| <i>Acadvl</i>  | acyl-Coenzyme A dehydrogenase, very long chain                      | GCGATCTACTACTGTGCTTCA  | NM_017366 |
| <i>Acadvl</i>  | acyl-Coenzyme A dehydrogenase, very long chain                      | CGGTTCTTTGAGGAAGTGAAT  | NM_017366 |
| <i>Acadvl</i>  | acyl-Coenzyme A dehydrogenase, very long chain                      | CTTTGCCAAGACGCCAATTAA  | NM_017366 |
| <i>Gabarap</i> | gamma-aminobutyric acid receptor associated protein                 | CGAATTCATCTCCGTGCTGAA  | NM_019749 |
| <i>Gabarap</i> | gamma-aminobutyric acid receptor associated protein                 | CGAATTCATCTCCGTGCTGAA  | NM_019749 |
| <i>Gabarap</i> | gamma-aminobutyric acid receptor associated protein                 | TCTTTGTCAACAATGTCATTC  | NM_019749 |
| <i>Gabarap</i> | gamma-aminobutyric acid receptor associated protein                 | ACCATGAAGAAGACTTCTTTC  | NM_019749 |
| <i>Gabarap</i> | gamma-aminobutyric acid receptor associated protein                 | CTCTGTACATCCGATGATTG   | NM_019749 |
| <i>Ctdnep1</i> | CTD nuclear envelope phosphatase 1                                  | GCCAATTCAACTTTGTTGTGA  | NM_026017 |
| <i>Dullard</i> | Dullard homolog (Xenopus laevis)                                    | CCGAAACCTTCACCAACATAG  | NM_026017 |
| <i>Dullard</i> | Dullard homolog (Xenopus laevis)                                    | AGGCAGATCCGCACGGTAATT  | NM_026017 |
| <i>Ctdnep1</i> | CTD nuclear envelope phosphatase 1                                  | CAGTATCAGACTGTTTCGATAT | NM_026017 |
| <i>Dullard</i> | Dullard homolog (Xenopus laevis)                                    | TCAGACTGTTTCGATATGATAT | NM_026017 |
| <i>Eif5a</i>   | eukaryotic translation initiation factor 5A                         | CCAATGCAGTGCTCAGCATTAA | NM_181582 |
| <i>Eif5a</i>   | eukaryotic translation initiation factor 5A                         | CGTCGAGATGTCTACTTCGAA  | NM_181582 |
| <i>Eif5a</i>   | eukaryotic translation initiation factor 5A                         | CCAACATCAAACGGAATGACT  | NM_181582 |
| <i>Eif5a</i>   | eukaryotic translation initiation factor 5A                         | GAGCAGAAGTATGACTGTGGA  | NM_181582 |
| <i>Eif5a</i>   | eukaryotic translation initiation factor 5A                         | CCAATGCAGTGCTCAGCATTAA | NM_181582 |

**Table S6 - Primer pairs used in real-time PCR analyses to test the knockdown of indicated genes in Neuro2A cells**

| <b>Mouse Gene</b> | <b>Forward Primer</b>  | <b>Reverse Primer</b> |
|-------------------|------------------------|-----------------------|
| <i>Asgr1</i>      | ACCCAGGGAAGTAGTGTGG    | TCCTTTCAGAGCCATTGCC   |
| <i>Dlg4</i>       | CACGAAGCTGGAGCAGGAG    | GGCCTGAGAGGTCTTCGATG  |
| <i>Acadv1</i>     | GGATTGTCAACGAGCAGTTCCT | CCTCAATGCACCAGCTATCA  |
| <i>Dvl2</i>       | TTTCAAGAGCGTTTTGCAGC   | ACACAAGCCAGGAGACAAC   |
| <i>Gabarap</i>    | CCTGGTGCCTTCTGATCTTAC  | CATGGTGTTCCTGGTACAGC  |
| <i>Ctdnep1</i>    | TAGAAGTGGTAAGCCAGTGGT  | GTGCAGTGCTGTCTGTAGT   |
| <i>Slc2a4</i>     | CTGTGCCATCTTGATGACCGTG | GTTGGAGAAACCAGCGACAGC |
| <i>Eif5a</i>      | CATGCCAAGGTCCATCTGG    | TGCCAATCAGCTGGAAGTC   |
